# Supplementary material for: Effects of high Ca and Mg stress on plants water use efficiency in a Karst ecosystem
Source: PeerJ. 2022 Aug 17;10:e13925. doi: 10.7717/peerj.13925 (PMC9392448; doi:10.7717/peerj.13925)
Supplement: Supplemental Information 1 [file peerj-10-13925-s001.xlsx]

## Sheet: Table S1
	English name	Plant Latin name	N	P	K	Ca	Mg	WUE
			(g·kg-1)	(g·kg-1)	(g·kg-1)	(g·kg-1)	(g·kg-1)	(μmol·mol-1)
	Herbaceous plants
	Peanut	Arachis hypogaea	40.1	3.8	16.2	11.3	3.7	73
	Sunflowers	Helianthus annuus	28.8	3.2	23.1	44.3	8.3	52
	Bracken	Pteridium aquilinum	25.7	2.2	14.6	18	3.5	44
	Roof iris	Iris tectorum	13.4	3.3	24.6	17.4	5.9	92
	Taro	Colocasia esculenta	21.7	3.8	35.5	30.4	3.6	68
	Indian chrysanthemum	Chrysanthemum indicum	24.7	4.5	25.6	22.2	2.2	54
	Horseweed	Conyza canadensis	23.3	4.8	21.7	27.7	2.1	38
	Woody plants
	Chinese firethorn	Pyracantha fortuneana	19.8	1.7	8.5	23.1	1.8	58
	Bird cherry	Padus racemosa	22.4	2.3	15.5	19.3	3.7	61
	Oak tree	Quercus fabri	15.2	0.9	6.4	6.1	2	62
	Chinese catalpa	Catalpa ovata	15.2	0.8	10.4	6.6	3.4	55
	Wheel wingnut	Cyclocarya paliurus	16.6	0.7	5.7	25.1	2.6	49
	Prickly wild rose	Rosa acicularis	15.5	0.8	6.9	15.9	4	54
	Japanese camellia	Camellia japonica	13.9	0.9	6.7	20.8	1.4	64
	Dahurian buckthorn	Rhamnus davurica	11.9	1	8.6	20.6	2.2	60
	Litsea cubeba	Litsea pungens	20	1.2	10.9	12.1	3.9	54
	Lobular buckthorn	Rhamnus parvifolia	14.4	2.1	9.8	24.1	2.9	56
	Chinese ilex	Ilex chinensis	10.4	0.4	6.3	38.8	4.6	52
	Eucommia bark	Eucommia ulmoides	13.5	2.2	10.5	13.7	2.3	53
